# Supplementary material
Source: MDPI journal article supplement (https://www.mdpi.com/2673-2688/5/1/16)
Supplement: s1 [file s1]

## Supplemental Material

Supplemental Table S1. Patch distribution per fold and class in the transformer network.

**Supplemental Table S1.** Patch distribution per fold and class in the transformer network.

|               | No Tumor | Low Grade | High Grade | Background | Discarded |
|---------------|----------|-----------|------------|------------|-----------|
| <b>Fold 1</b> | 10507    | 13870     | 3751       | 11056      | 31908     |
| <b>Fold 2</b> | 9704     | 13990     | 3006       | 11538      | 33414     |
| <b>Fold 3</b> | 10459    | 14844     | 4763       | 7795       | 33203     |

Supplemental Table S2. Results for the extended CRC dataset while integrating the transformer networks.

**Supplemental Table S2.** Results for the extended CRC dataset while integrating the transformer networks.

| Model           | Average (%)<br>(Binary) | Weighted (%)<br>(Binary) | Average (%)<br>(3-classes) | Weighted (%)<br>(3-classes) |
|-----------------|-------------------------|--------------------------|----------------------------|-----------------------------|
| <b>T+D121</b>   | 98.33±1.25              | 98.17±1.30               | 88.91±3.81                 | 86.37±4.12                  |
| <b>T+EffB1</b>  | 99.67±0.47              | 99.72±0.39               | 89.58±4.17                 | 87.50±3.54                  |
| <b>T+EffB2</b>  | 98.66±0.95              | 98.74±0.91               | 89.92±2.50                 | 87.22±2.08                  |
| <b>T+EffB3</b>  | 98.66±0.95              | 98.89±0.70               | 88.25±2.55                 | 84.44±1.42                  |
| <b>T+EffB4</b>  | 97.65±0.95              | 98.06±0.79               | 88.92±3.62                 | 84.72±3.36                  |
| <b>T+EffB5</b>  | 98.32±1.72              | 98.46±1.37               | 89.91±5.42                 | 88.05±5.67                  |
| <b>T+EffB7</b>  | 97.66±1.24              | 97.91±0.89               | 88.59±1.30                 | 84.44±0.38                  |
| <b>T+6.4GF</b>  | 94.30±2.07              | 94.57±1.75               | 85.89±3.64                 | 81.94±5.11                  |
| <b>T+16GF</b>   | 97.66±1.88              | 97.62±1.56               | 88.57±3.93                 | 85.54±3.76                  |
| <b>T+Res152</b> | 94.64±2.04              | 94.82±1.38               | 85.57±1.31                 | 81.36±0.76                  |
| <b>T+SER50</b>  | 95.31±1.24              | 95.52±0.83               | 85.22±3.37                 | 79.70±6.3                   |
